# Supplementary material
Source: publisher figshare collection journal article supplement (https://tandf.figshare.com/ndownloader/files/13086107)
Supplement: Supplementary file 1 [file 13086107]

	precision	recall	F1
digital	0.43609022556391	0.816901408450704	0.568627450980392
movements	0.551724137931034	0.25	0.344086021505376
crime	0.338709677419355	0.807692307692308	0.477272727272727
sports	0.6	0.947368421052632	0.73469387755102
culture/arts	0.368421052631579	0.91304347826087	0.525
foreign politics	0.452054794520548	0.540983606557377	0.492537313432836
conflict	0.315789473684211	0.666666666666667	0.428571428571429
politics	0.485714285714286	0.459459459459459	0.472222222222222
economy	0.606666666666667	0.875	0.716535433070866
media/tech	0.767123287671233	0.736842105263158	0.751677852348993
